# Supplementary material for: Identification of key microRNAs and the underlying molecular mechanism in spinal cord ischemia-reperfusion injury in rats
Source: PeerJ. 2021 May 27;9:e11454. doi: 10.7717/peerj.11454 (PMC8164840; doi:10.7717/peerj.11454)
Supplement: Supplemental Information 1 [file peerj-09-11454-s001.xlsx]

## Sheet: expression of upregulated miR
	Sham				SCII
miR-3568	1	0.97501	0.932295	0.965453	2.41589	3.68088	2.25713	3.01463
miR-144-3p	1	0.90582	0.94871	1.1358	2.6548	2.6515	2.1515	2.9847
miR-34c-3p	1	0.90525	1.1581	0.928468	3.45187	4.05225	3.54881	3.0149
miR-463	1	0.9878	1.18547	0.96587	4.589	4.8725	4.9572	5.47215

## Sheet: expression of downregulated miR
	Sham				SCII
miR-291a-3p	1	0.98214	0.8948	1.02545	0.3251	0.2515	0.52424	0.3453
miR-702-3p	1	0.9842	0.9914	0.911484	0.5251	0.820514	0.6254	0.4486
miR-28-5p	1	1.15221	0.9645	1.0245	0.2325	0.3945	0.4547	0.25462
miR-199a-3p	1	1.05184	0.98722	1.0005	0.15026	0.3515	0.2547	0.2545
miR-352	1	0.9545	1.02155	0.9878	0.3251	0.2545	0.4251	0.21566
miR-743b-3p	1	0.92548	1.1522	1.05153	0.6556	0.51564	0.54793	0.51546
miR-125b-2-3p	1	0.965565	0.98746	1.02155	0.6542	0.62156	0.5246	0.4925
miR-129-1-3p	1	0.9587	0.92778	0.9847	0.46658	0.71256	0.5146	0.6245

## Sheet:  expression of six protein
cleaved-caspase-3
Sham	SCII	SCII+AMO-3568	SCII+NC-3568
0.0963	0.3265	0.142168	0.299282
0.1163	0.2593	0.150809	0.229282
0.1368	0.2099	0.155356	0.215632
0.1025	0.2356	0.12535	0.2145
Bax
Sham	SCII	SCII+AMO-3568	SCII+NC-3568
0.173257	0.459268	0.227178	0.447193
0.206653	0.399848	0.259222	0.41312
0.183257	0.329403	0.191075	0.420408
0.1568	0.35156	0.23215	0.39245
Bcl-2
Sham	SCII	SCII+AMO-3568	SCII+NC-3568
0.410236	0.143318	0.362943	0.137831
0.439596	0.18052	0.34594	0.22749
0.392558	0.187706	0.271646	0.193931
0.37514	0.1624	0.25463	0.150262
RBPJ
Sham	SCII	SCII+AMO-3568	SCII+NC-3568
0.0549451	0.639535	0.267442	0.635294
0.097218	0.625768	0.246795	0.580004
0.100728	0.666171	0.28076	0.590075
0.10456	0.55021	0.302516	0.5516
GATA6
Sham	SCII	SCII+AMO-3568	SCII+NC-3568
0.483516	0.709302	0.453488	0.729412
0.44522	0.683631	0.499117	0.669475
0.408295	0.553631	0.465962	0.551342
0.35446	0.56598	0.43524	0.65468
GATA4
Sham	SCII	SCII+AMO-3568	SCII+NC-3568
0.195604	0.45814	0.165116	0.476471
0.121125	0.429998	0.181356	0.433741
0.154132	0.334165	0.15368	0.341446
0.10254	0.396815	0.1925	0.38165
